# Supplementary material for: Electronic and optical properties of a novel two-dimensional semiconductor material TlPt2S3: a first-principles study
Source: Royal Society of Chemistry journal article supplement (doi:10.1039/d1cp05918a), 2022-01-01
Supplement: d1cp05918a1.pdf [file d1cp05918a1.pdf]

Supporting Information

## Electronic and optical properties of a novel two-dimensional semiconductor material $\text{TIPT}_2\text{S}_3$ : a first-principles study

Xin Yang <sup>a</sup>, Yanqing Shen <sup>a,b,\*</sup>, Jiajia Liu <sup>a</sup>, Xianghui Meng <sup>a</sup>, Xu Gao <sup>a</sup>,

Lingling Lv <sup>a</sup>, Min Zhou <sup>a</sup>, Yu Zhang <sup>a</sup>, Yangdong Zheng <sup>a</sup>,

Zhongxiang Zhou <sup>a,b</sup>

<sup>a</sup>School of Physics, Harbin Institute of Technology, Harbin, 150001, PR China

<sup>b</sup>Heilongjiang Provincial Key Laboratory of Plasma Physics and Application Technology, Harbin Institute of Technology, Harbin 150001, PR China

\*Corresponding authors: Yanqing Shen, E-mail: [shenyanqing2004@163.com](mailto:shenyanqing2004@163.com)

The phonon dispersion curve, the AIMD and the work function of bilayer  $\text{TIPT}_2\text{S}_3$  have shown in Fig.S1. It can be seen that any negative phonon frequency is complete absence in the phonon dispersion curve of bilayer  $\text{TIPT}_2\text{S}_3$ , and neither phase transitions nor significant structural distortions is observed during the AIMD process, which indicates that the structure of bilayer  $\text{TIPT}_2\text{S}_3$  is thermo-dynamically stable. The work function of the bilayer  $\text{TIPT}_2\text{S}_3$  (4.98 eV) in the vacuum environment shows it is also chemical stability.

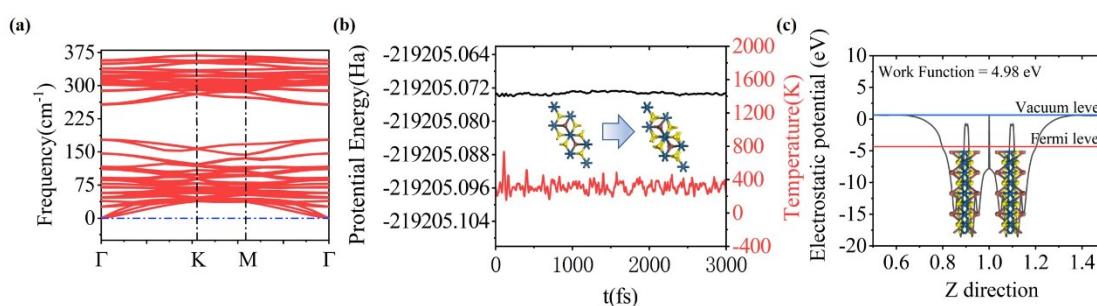

Fig. S1 (a) Phonon-dispersion spectrum for bilayer  $\text{TIPT}_2\text{S}_3$ . (b) Energy variations during the AIMD simulation under a temperature of 300 K. Inset plots show the bilayer  $\text{TIPT}_2\text{S}_3$  structure before and after simulation. (c) Work function and electrostatic potential along the direction perpendicular to the plane.

Table S1 summarizes the corresponding values of  $\mu^{2D}$ ,  $C_{2D}$ ,  $m^*/m_0$  and  $E_d$  of the bilayer TIPT<sub>2</sub>S<sub>3</sub>. The electron mobility along the armchair direction is 13635.04 cm<sup>2</sup> V<sup>-1</sup> s<sup>-1</sup>, whereas along the zigzag direction it is calculated to 12332.20 cm<sup>2</sup> V<sup>-1</sup> s<sup>-1</sup>. The hole mobility along the armchair and zigzag direction are 3531.33 cm<sup>2</sup> V<sup>-1</sup> s<sup>-1</sup> and 858.55 cm<sup>2</sup> V<sup>-1</sup> s<sup>-1</sup>, respectively. It can be found that these electron and hole mobilities are much higher than that of the monolayer TIPT<sub>2</sub>S<sub>3</sub>.

Table S1 Effective mass  $m^*/m_0$ , DP constant  $E_d$  (eV), in-plane stiffness  $C_{2D}$  (N·m<sup>-1</sup>) and carrier mobility  $\mu$  (cm<sup>2</sup>·V<sup>-1</sup>·s<sup>-1</sup>) for electrons and holes of bilayer TIPT<sub>2</sub>S<sub>3</sub>.

| Carrier type |     | $m^*/m_0$ | $E_d$ (eV) | $C_{2D}$ (N·m <sup>-1</sup> ) | $\mu$ (cm <sup>2</sup> ·V <sup>-1</sup> ·s <sup>-1</sup> ) |
|--------------|-----|-----------|------------|-------------------------------|------------------------------------------------------------|
| Electron     | arm | 0.78      | 0.57       | 108.45                        | 13635.04                                                   |
|              | zig | 0.55      | 0.72       | 107.96                        | 12332.20                                                   |
| Hole         | arm | 0.69      | 1.15       | 108.45                        | 3531.33                                                    |
|              | zig | 0.75      | 2.23       | 107.96                        | 858.55                                                     |
